# Supplementary material
Source: publisher site journal article supplement (https://www.spandidos-publications.com/8558/downloadSupplementary)

Figure S1. Standardized distribution of the GSE30122 dataset.

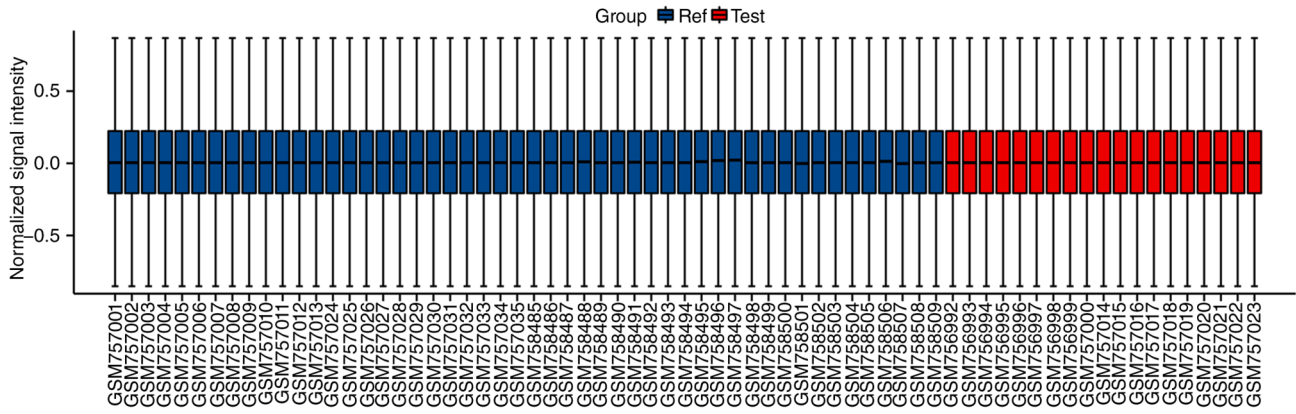

Supplement: Supplementary file 1 [file downloadSupplementary]
